# Supplementary material
Source: Springer Nature journal article supplement (https://www.springermedizin.de/resource/supplementary/12884_2013_854_MOESM2_ESM.pdf/9458354)
Supplement: MOESM2 [file 9458354]

Ratio

%

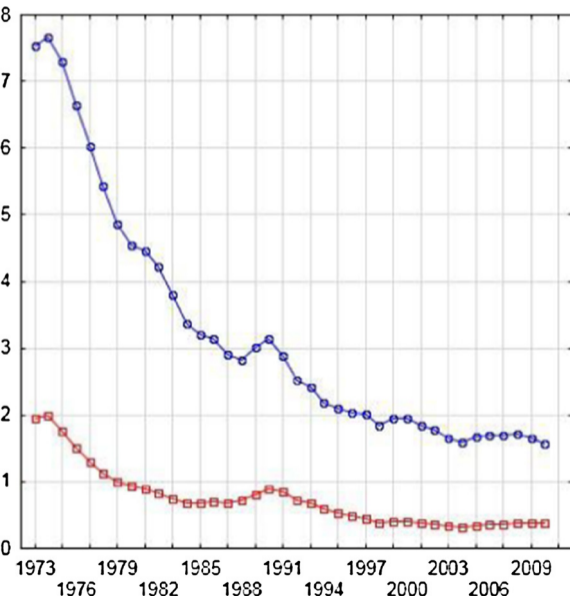

- Ratio of adolescent births of all deliveries
- Ratio of adolescent births of the female adolescent population
